# Supplementary material for: HIV Diversity Considerations in the Application of the Intact Proviral DNA Assay (IPDA)
Source: bioRxiv or medRxiv preprint supplement (doi:10.1101/2020.05.26.115006), 2020-05-28
Supplement: Supplementary file [file media-1.pdf]

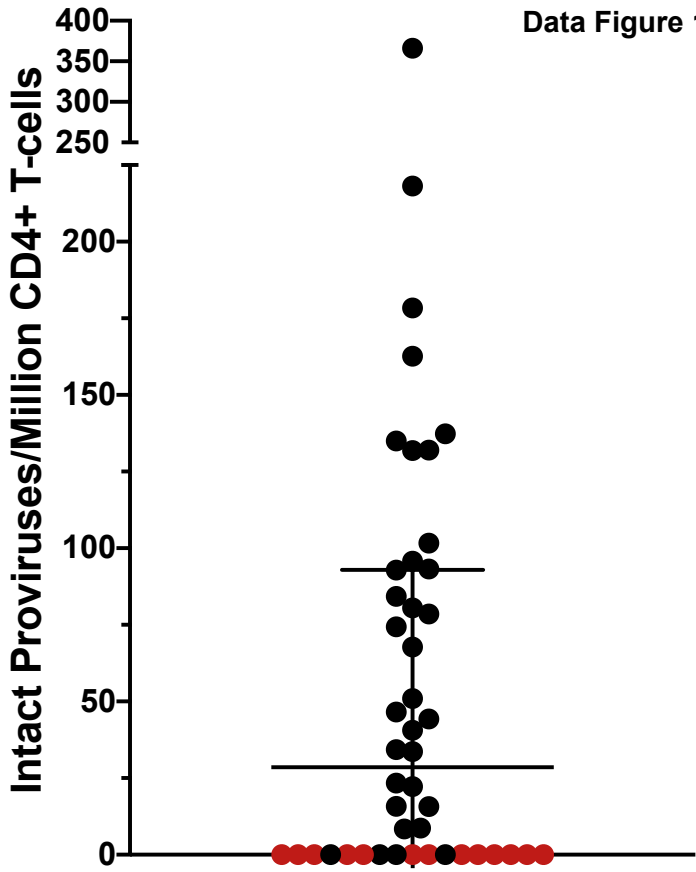

**Extended Data Figure 1: IPDA results for 46 study participants.** Line and error bars indicate cohort median and interquartile range; red datapoints represent 13 presumed instances of IPDA detection failure.

Extended Data Figure 2

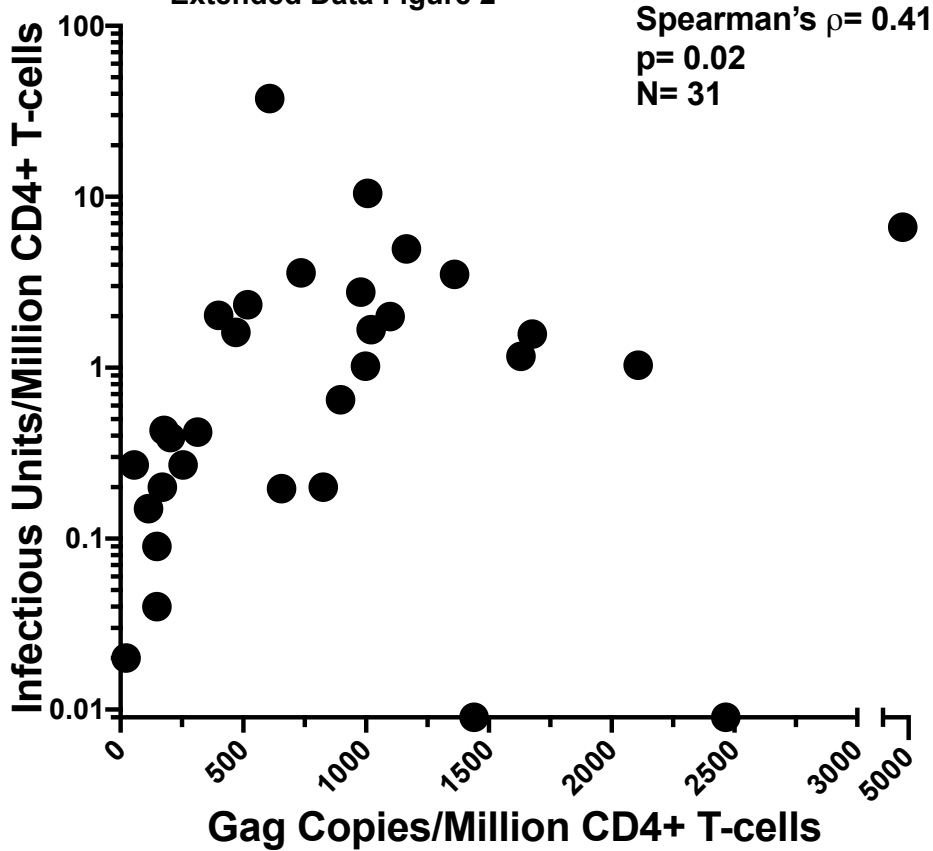

**Extended Data Figure 2: Spearman's correlation between QVOA and HIV *gag* copies/million CD4+ T-cells in a North American cohort.** Data were available for N=31 participants. Two individuals for whom no replication competent viruses were detected (IUPM= 0) are plotted on the X-axis.

Positive control (J-Lat)

992,516 Intact Provirus/Million CD4+ T-cells

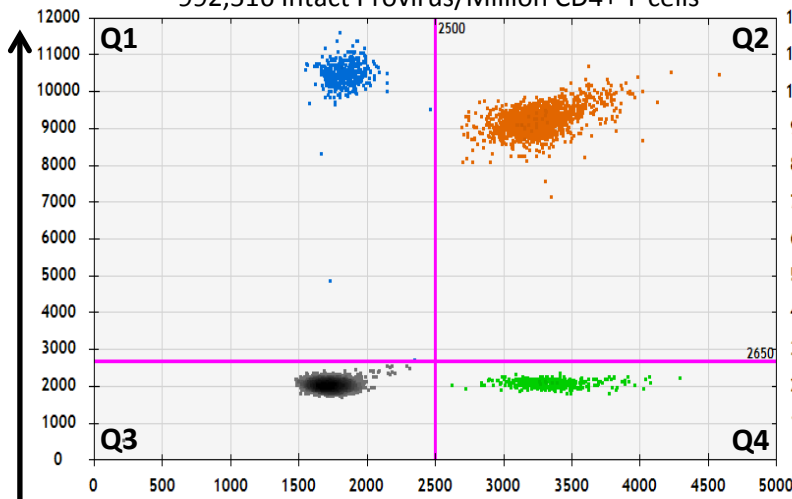

Negative control (HIV-negative DNA)

(0 Intact Provirus/Million CD4+ T-cells)

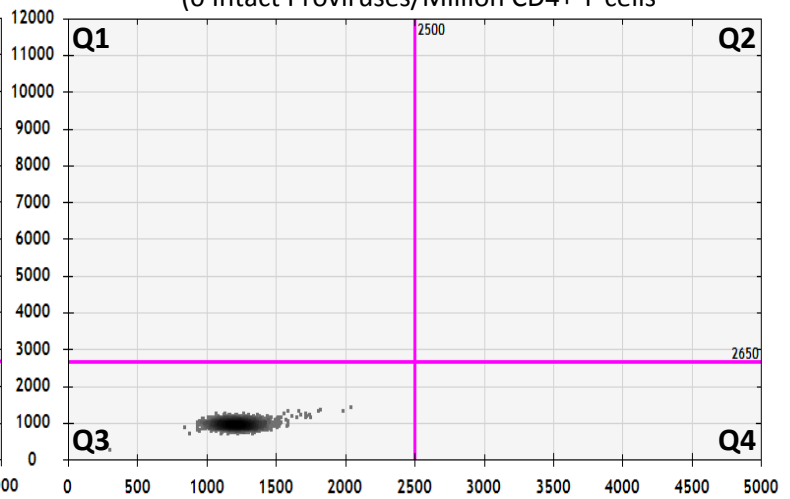

Example IPDA presumed true-positive Participant

132 Intact Provirus/Million CD4+ T-cells

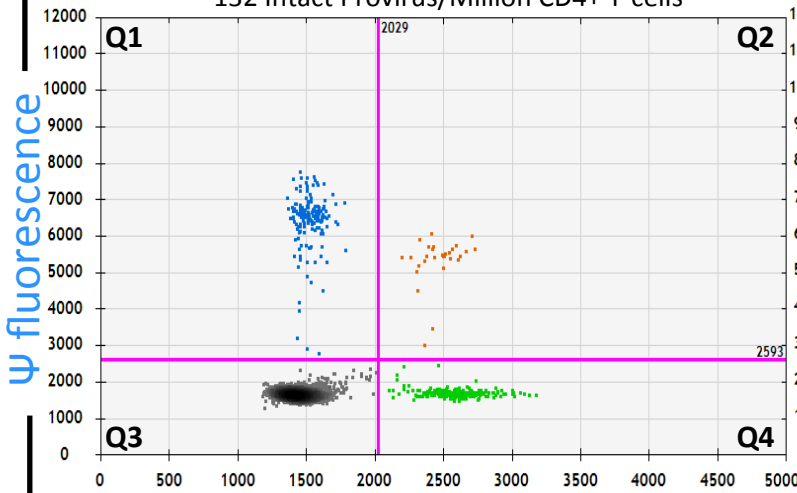

Example IPDA presumed true-negative participant

0 Intact Provirus/Million CD4+ T-cells

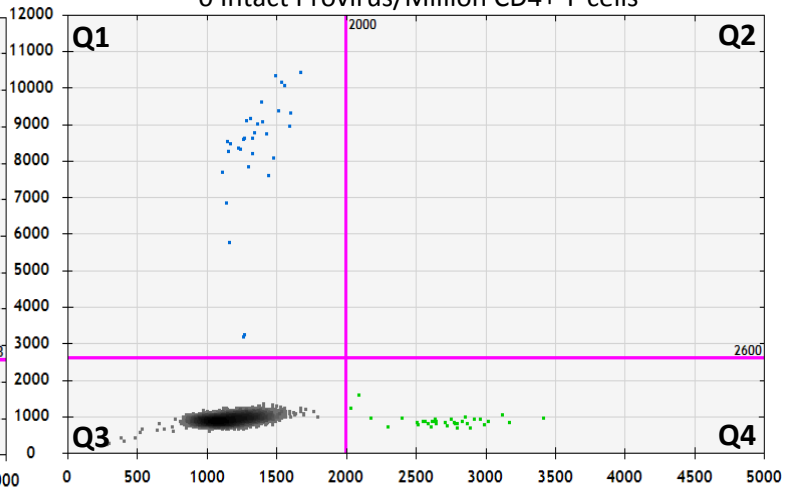

Example Ψ presumed detection failure participant

0 Intact Provirus/Million CD4+ T-cells

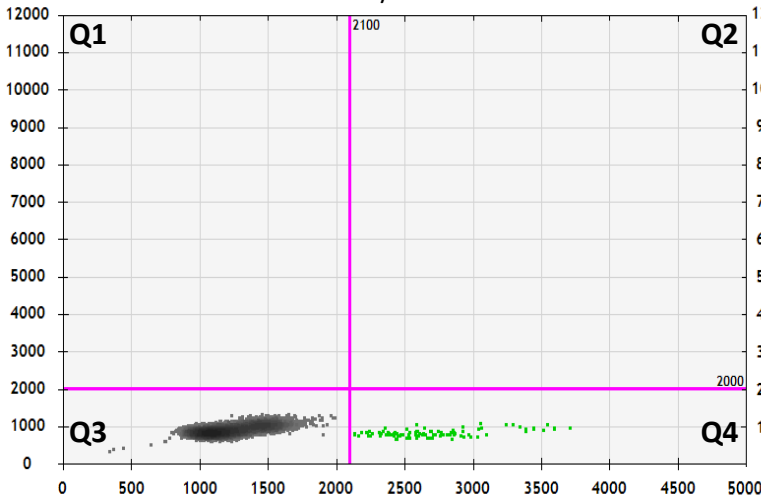

Example env presumed detection failure participant

0 Intact Provirus/Million CD4+ T-cells

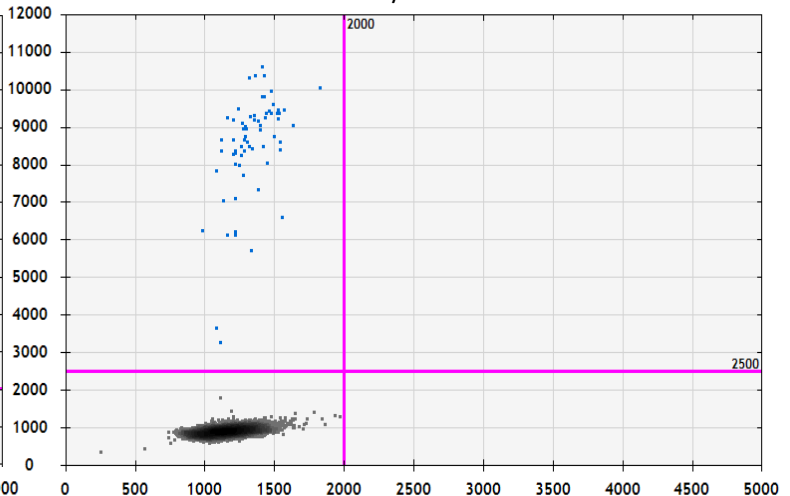

env fluorescence

**Extended Data Figure 3: Example IPDA 2D plots for control and participant samples.** 2D ddPCR plots showing  $\Psi$ -single positive events (Q1, blue),  $\Psi$ - and *env*-double positive events (Q2, orange), double-negative events (Q3, grey) and *env*-single positive events (Q4, green), for positive control J-Lat cell line (top left; 1 copy of HIV per cell, droplets in Q1 and Q4 are a result of anticipated DNA shearing that occurs during DNA extraction that is subsequently corrected mathematically based on RPP30 shearing); HIV-negative donor negative control (top right); IPDA true-positive participant (middle left); IPDA true-negative participant (middle right) and IPDA detection failures (bottom row). Plots show merge of replicate wells.

**Ψ sequence polymorphisms in IPDA Ψ detection failure samples**

| ID      | Ψ Forward Primer<br>CAGGACTCGGCTTGCTGAAG | Ψ Probe<br>ACTGGTGAGTACGCCAAAA | Ψ Reverse Primer<br>GCTAGAAGGAGAGAGATGGGTGC |
|---------|------------------------------------------|--------------------------------|---------------------------------------------|
| HGLK001 | -----GC                                  | -----T                         | -----                                       |
| OM5365  | -----GC                                  | R-----TT                       | -----                                       |
| WWH-012 | -----GC                                  | -----                          | -----                                       |
| WWH-031 | -----A--                                 | -ACA-A-----TT                  | -----A--A-A--                               |
| BC-014  | -----                                    | -AC-----                       | -----                                       |

**env sequence polymorphisms in IPDA env detection failure samples**

| ID       | env Forward Primer<br>AGTGGTGCAGAGAGAAAAAGAGC | env Probe<br>CCTTGGGTTCTTGGGA | env Reverse Primer<br>GCTGACGGTACAGGCCAGAC |
|----------|-----------------------------------------------|-------------------------------|--------------------------------------------|
| HGLK002  | -----G-----                                   | ---C-----ATC---               | -----R-----                                |
| HGLK005  | -----*R-K--G-----                             | ---C-----                     | -----R-----                                |
| CIENI223 | -----                                         | ---C-----                     | -----R-----                                |
| OM5334   | -----G-----                                   | -----A-----                   | -----R-----                                |
| CIRC0333 | -----                                         | -----T-----                   | -----A-----                                |
| WWH-011  | -----G-----                                   | -----                         | -----                                      |
| WWH-026  | -----                                         | -----T-----                   | -----                                      |
| WWH-031  | -----                                         | ---G-----TC---                | -----                                      |
| BC-004   | -----A-----                                   | -----YC-----                  | -----                                      |

\* = ATGCWR insertion prior to R

**Extended Data Figure 4: HIV polymorphism in IPDA primer/probe binding sites.**

Primer and probe region sequences for participants with  $\Psi$  (top) or *env* (bottom) detection failure. Hyphens (–) indicate matches to the IPDA primer or probe; red letters indicate mismatches; asterisk indicates the location of an insertion.



# 91C33

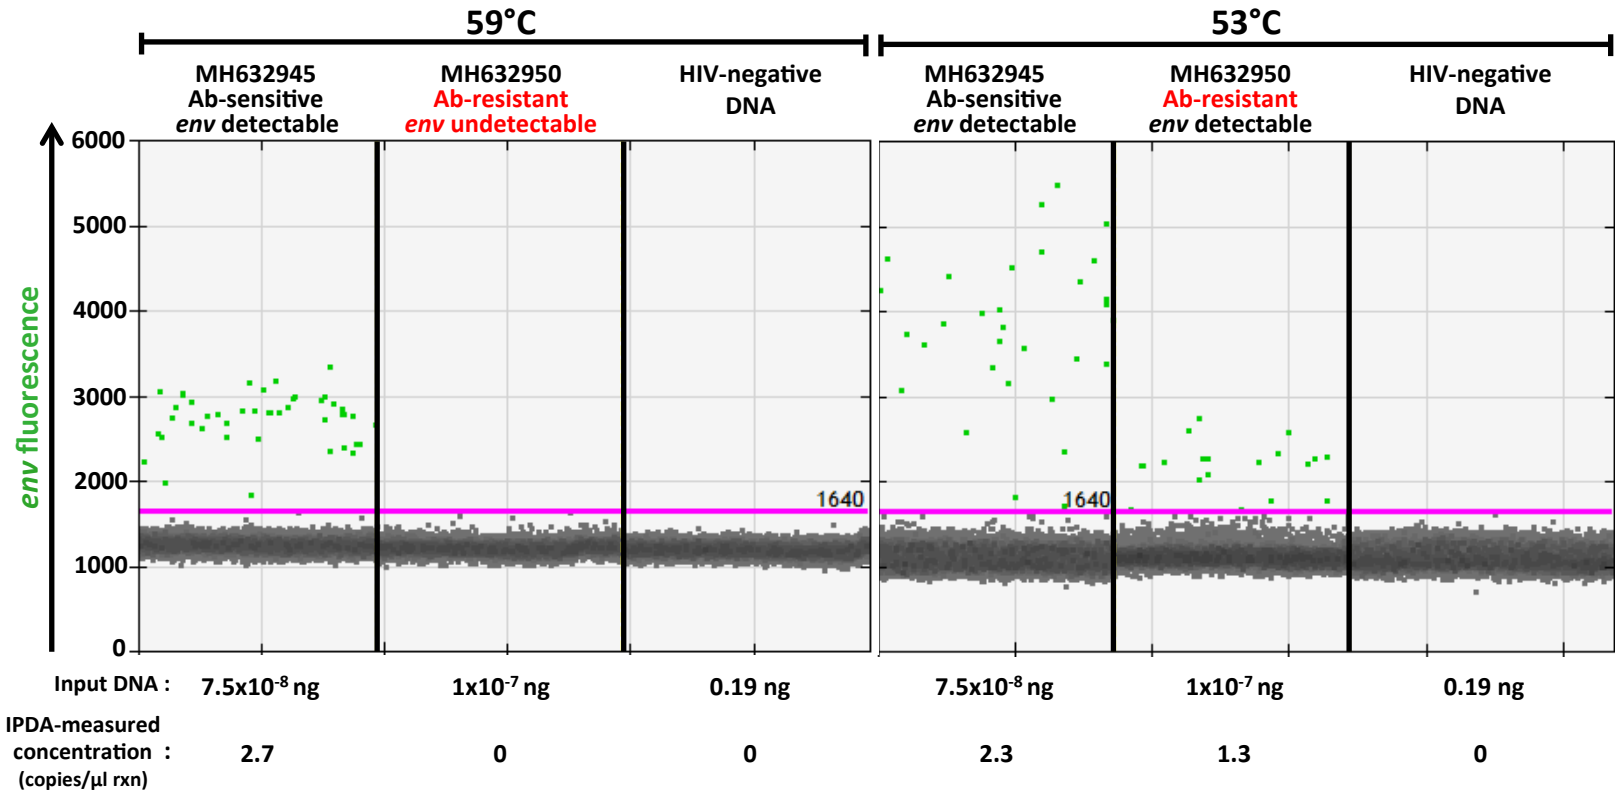

**Extended Data Figure 5: Modification of published IPDA conditions to reduce assay stringency allows for detection of 91C33 mismatch variant.** Representative ddPCR IPDA *env* plots for MH632945 (representing 91C33's bNAb-sensitive, IPDA *env* probe-matching HIV population) and MH632950 (representing 91C33's bNAb-resistant, IPDA *env* probe-mismatched HIV population); positive droplets are green and negative droplets are grey. Templates were purified *env* PCR products of equal length and comparable quantities. HIV-negative donor DNA served as a negative control. (left): results under published conditions; (right): result when assay annealing/extension temperature was reduced to 53°C.

**A OM5346 Env**

- pre-ART (2012)
- proviral (2017/2019)
- outgrowth virus (2017)

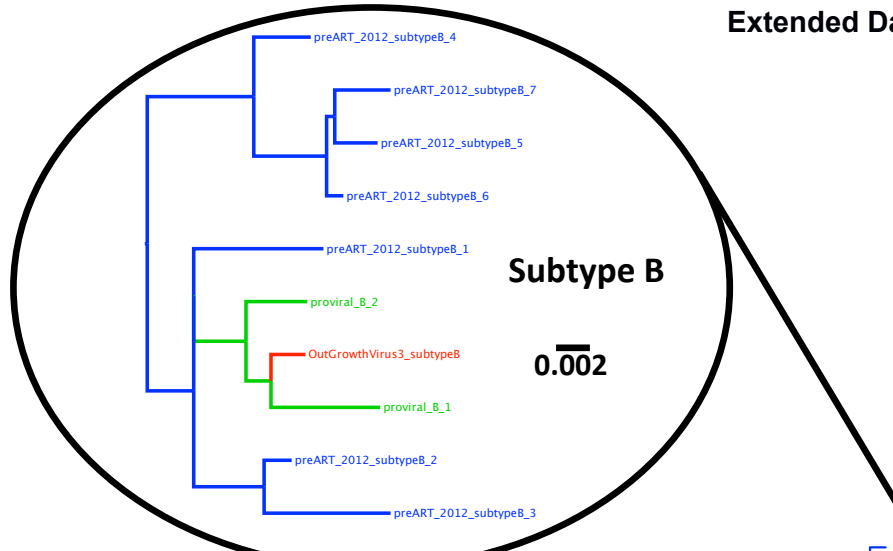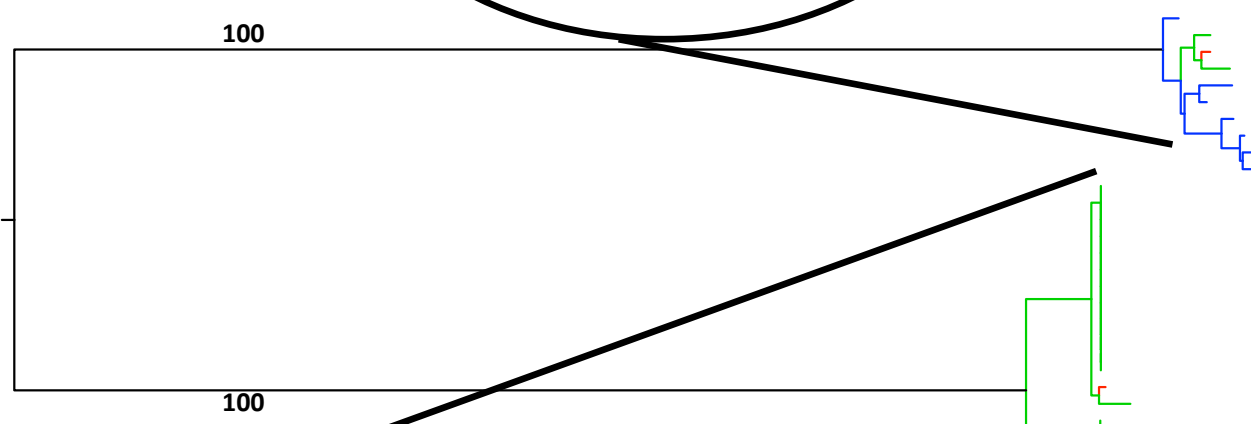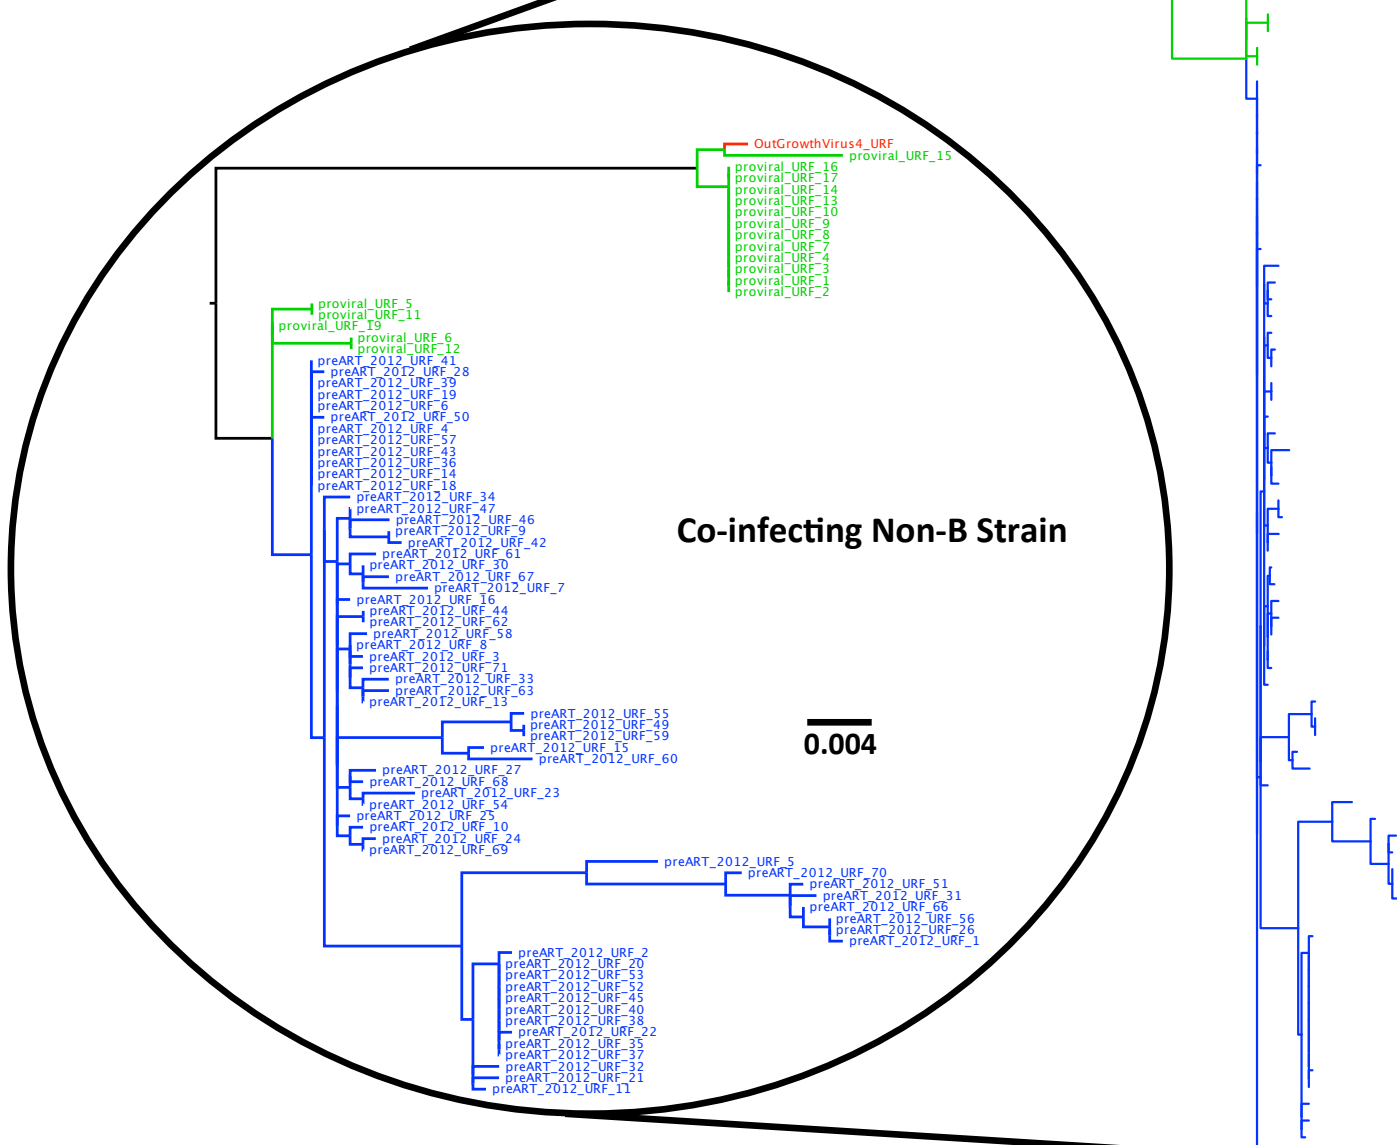

0.04

# B OM5346 Pol

- pre-ART (2012)
- proviral (2017/2019)
- outgrowth virus (2017)
- drug resistance genotype (2012)

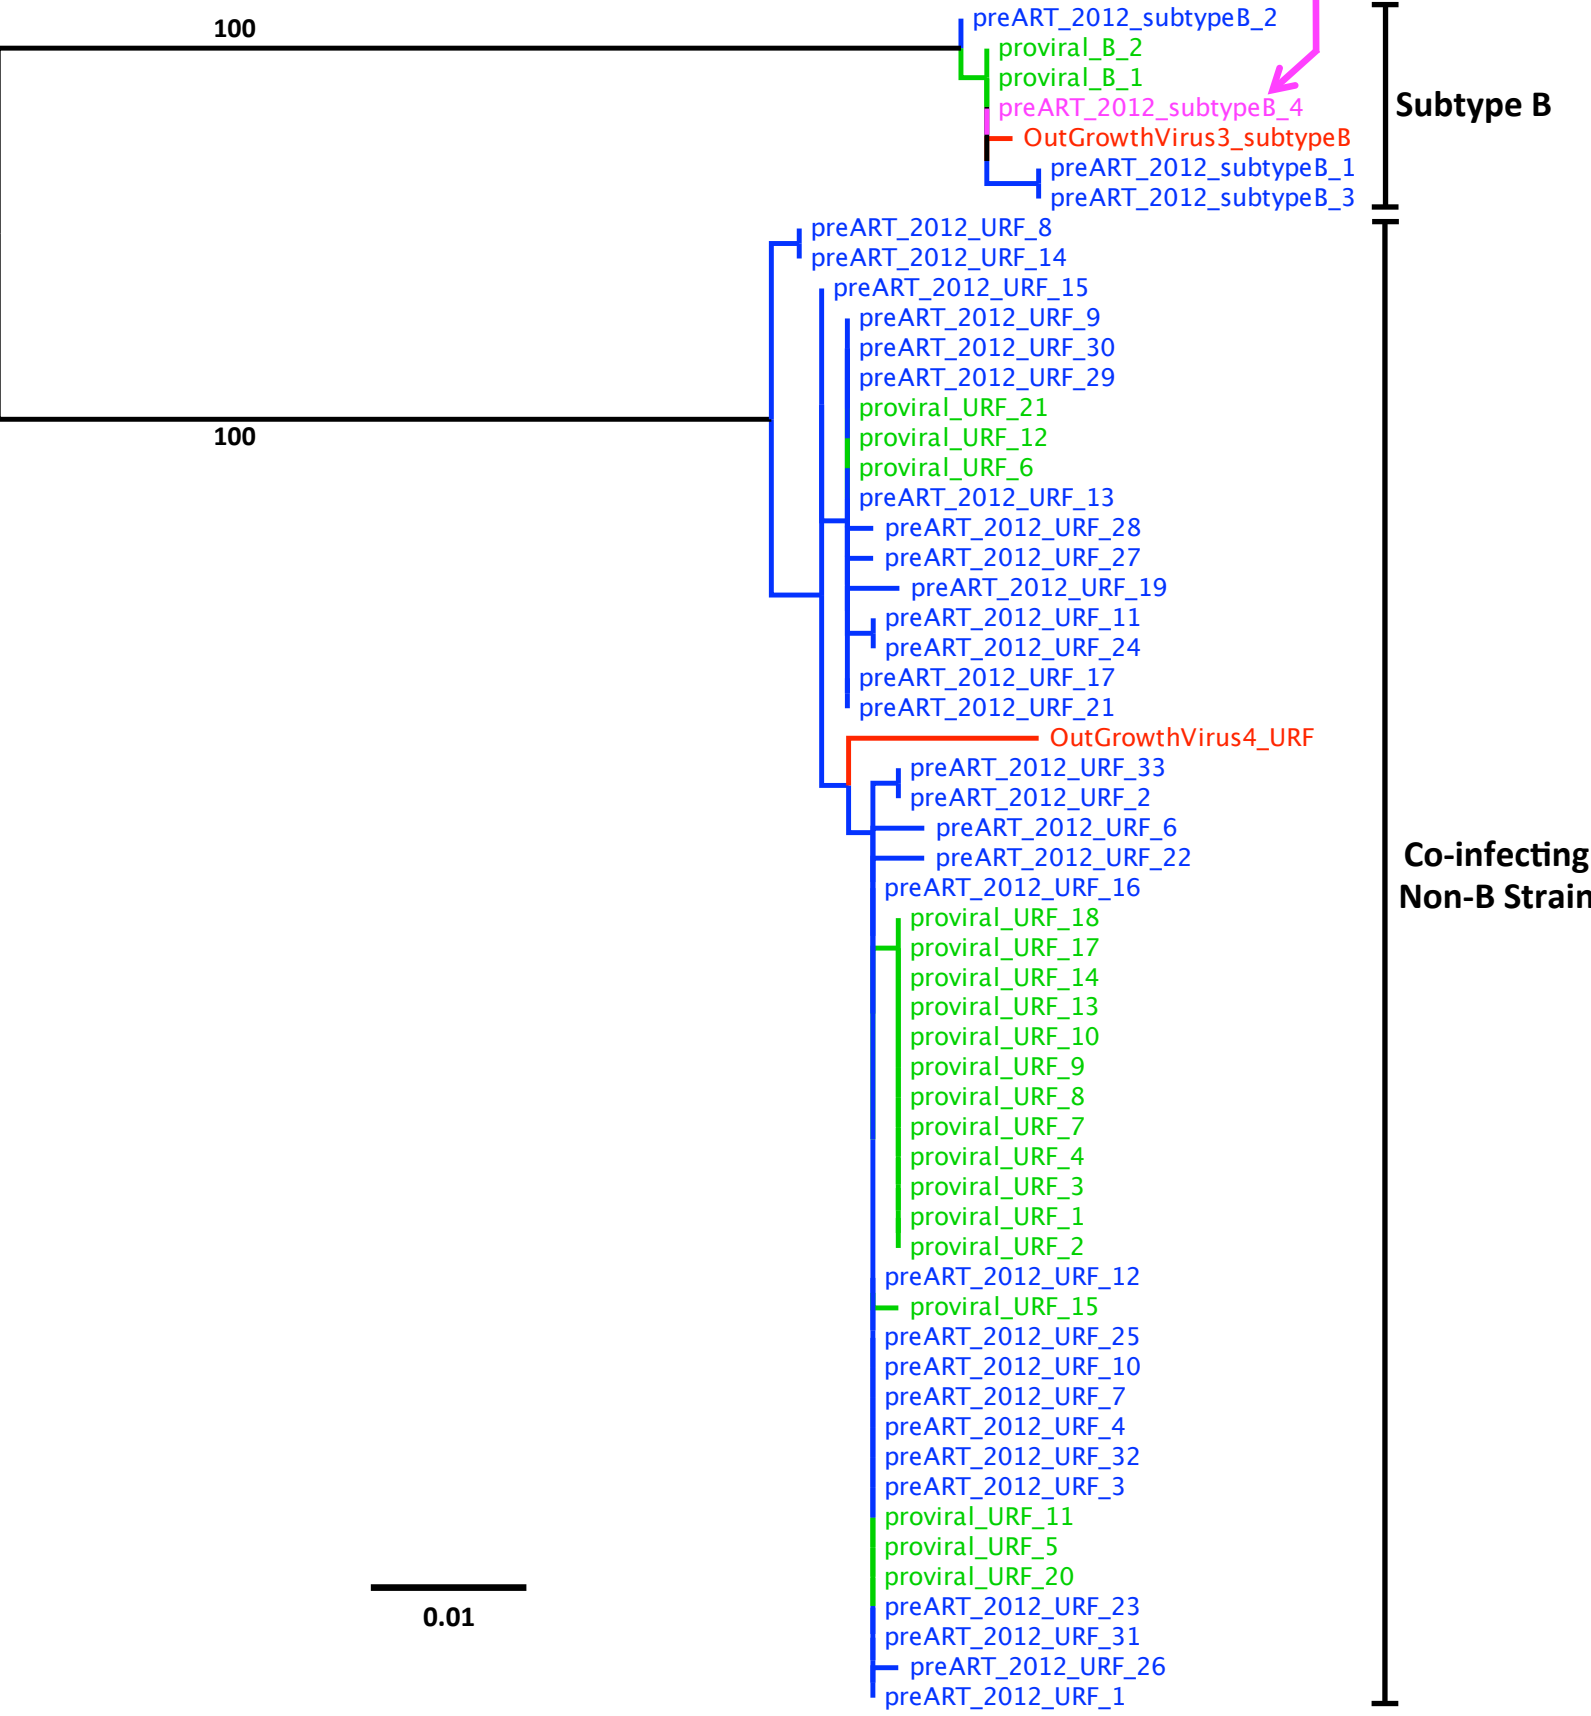

**Extended Data Figure 6: *Env* and *pol* phylogenies for participant OM5346, who is co-infected with two HIV strains.** (A). Maximum likelihood phylogeny inferred from single-genome-amplified *env* RNA sequences from pre-ART plasma (2012, blue), proviruses sampled on ART (2017 and 2019, green) and replication competent HIV sequences isolated from the reservoir (2017, red). (B). The *pol* phylogeny additionally includes a sequence from a clinical HIV drug resistance test performed in 2012 (pink). *Pol* sequences of replication-competent reservoir sequences (2017, red) were recovered from cells infected with these viruses *in vitro*. Scale bars indicate substitutions per nucleotide site. Numbers on main branches indicate branch support values.

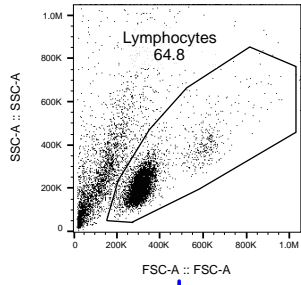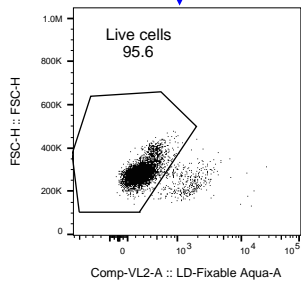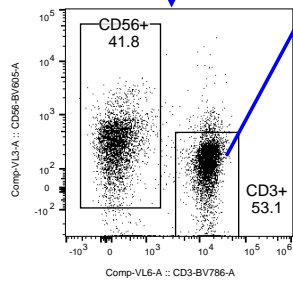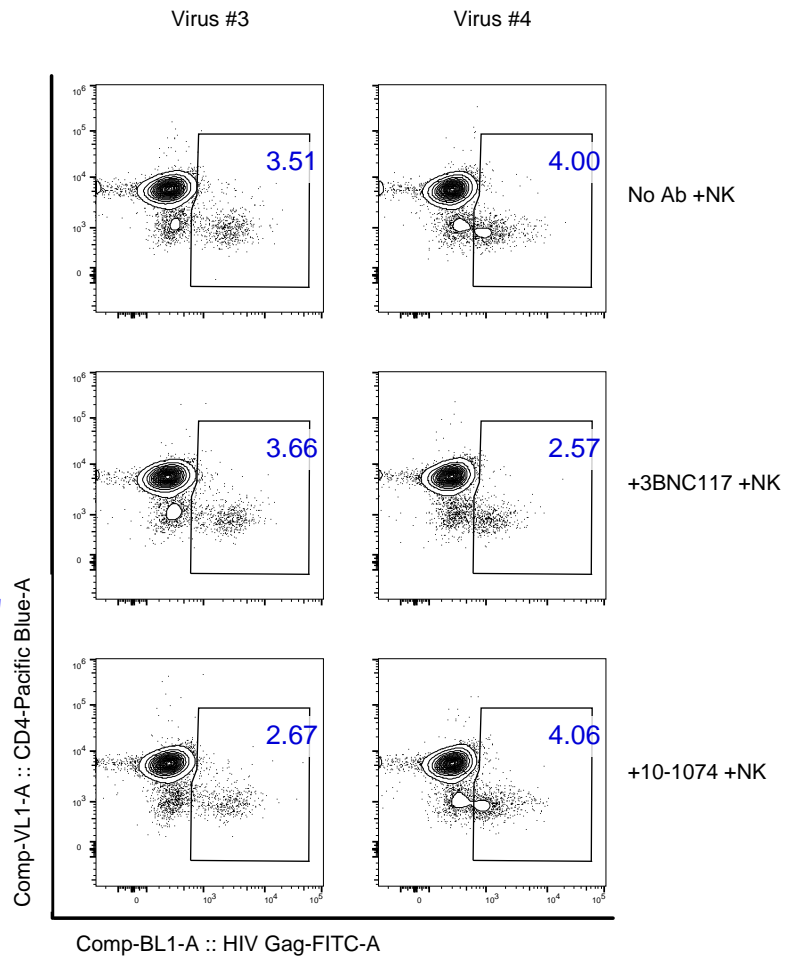

**Extended Data Figure 7: OM5346 ADCC gating strategy.** Representative flow plots showing flow cytometry gating strategy: Lymphocytes -> live cells (live/dead dye-) -> NK cells (CD56<sup>+</sup>) and T-cells (CD3<sup>+</sup>) -> HIV-positive cells (HIV Gag<sup>+</sup>) from T-cell population. Activated CD4<sup>+</sup> T-cells from an HIV-negative donor were infected with OM5346 virus 3 (left) or virus 4 (right). NK cells were isolated from an HIV-negative donor. Plots on the top row show CD4<sup>+</sup> T-cells in control experiments (with no bNAbs or NK cells added), 2<sup>nd</sup> row shows CD4<sup>+</sup> T cells remaining after addition of NK cells only, 3<sup>rd</sup> row shows CD4<sup>+</sup> T cells remaining after addition of 3BNC117 and NK cells, 4<sup>th</sup> row shows CD4<sup>+</sup> T cells remaining after addition of 10-1074 and NK cells. CD4 downregulation in HIV-positive cells (HIV Gag<sup>+</sup>) occurs due to Nef-induced CD4 downregulation.

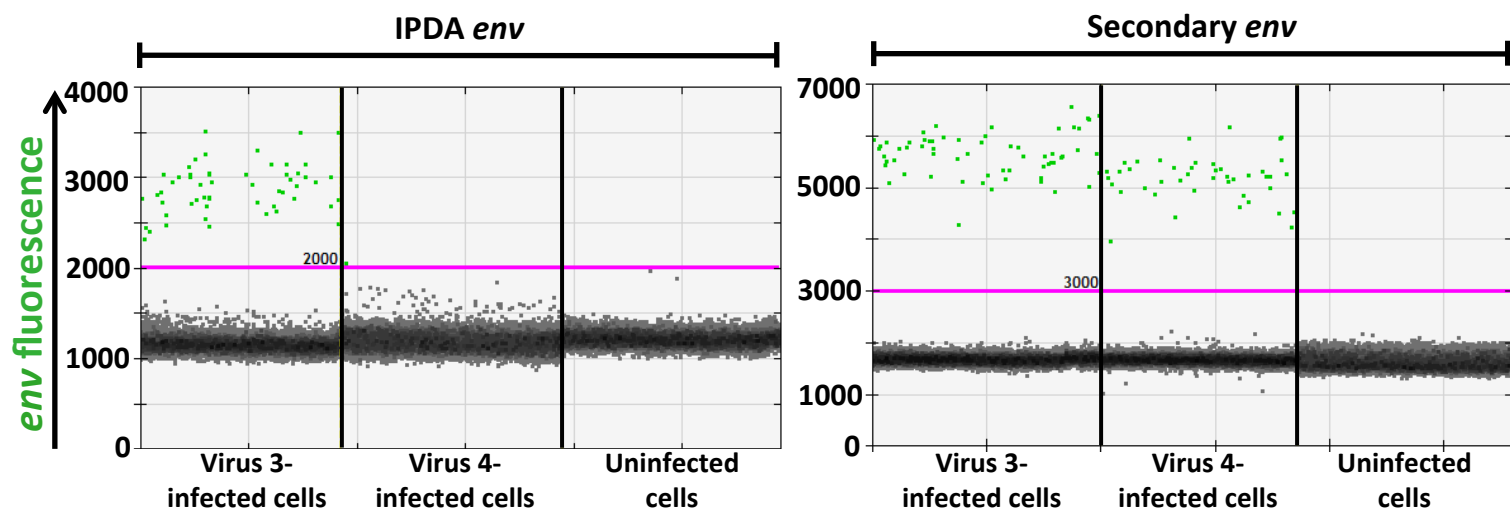

|                                                   | IPDA env               |                        |                  |  | Secondary env          |                        |                  |
|---------------------------------------------------|------------------------|------------------------|------------------|--|------------------------|------------------------|------------------|
|                                                   | Virus 3-infected cells | Virus 4-infected cells | Uninfected cells |  | Virus 3-infected cells | Virus 4-infected cells | Uninfected cells |
| input DNA                                         | 0.75 ng                | 0.75 ng                | 0.75 ng          |  | 0.75 ng                | 0.75 ng                | 0.75 ng          |
| IPDA-measured concentration (copies/ $\mu$ l rxn) | 3.6                    | 0.06                   | 0                |  | 3.6                    | 3.1                    | 0                |

**B** Detection of Virus 4 pure template at high, but not participant-like, concentrations

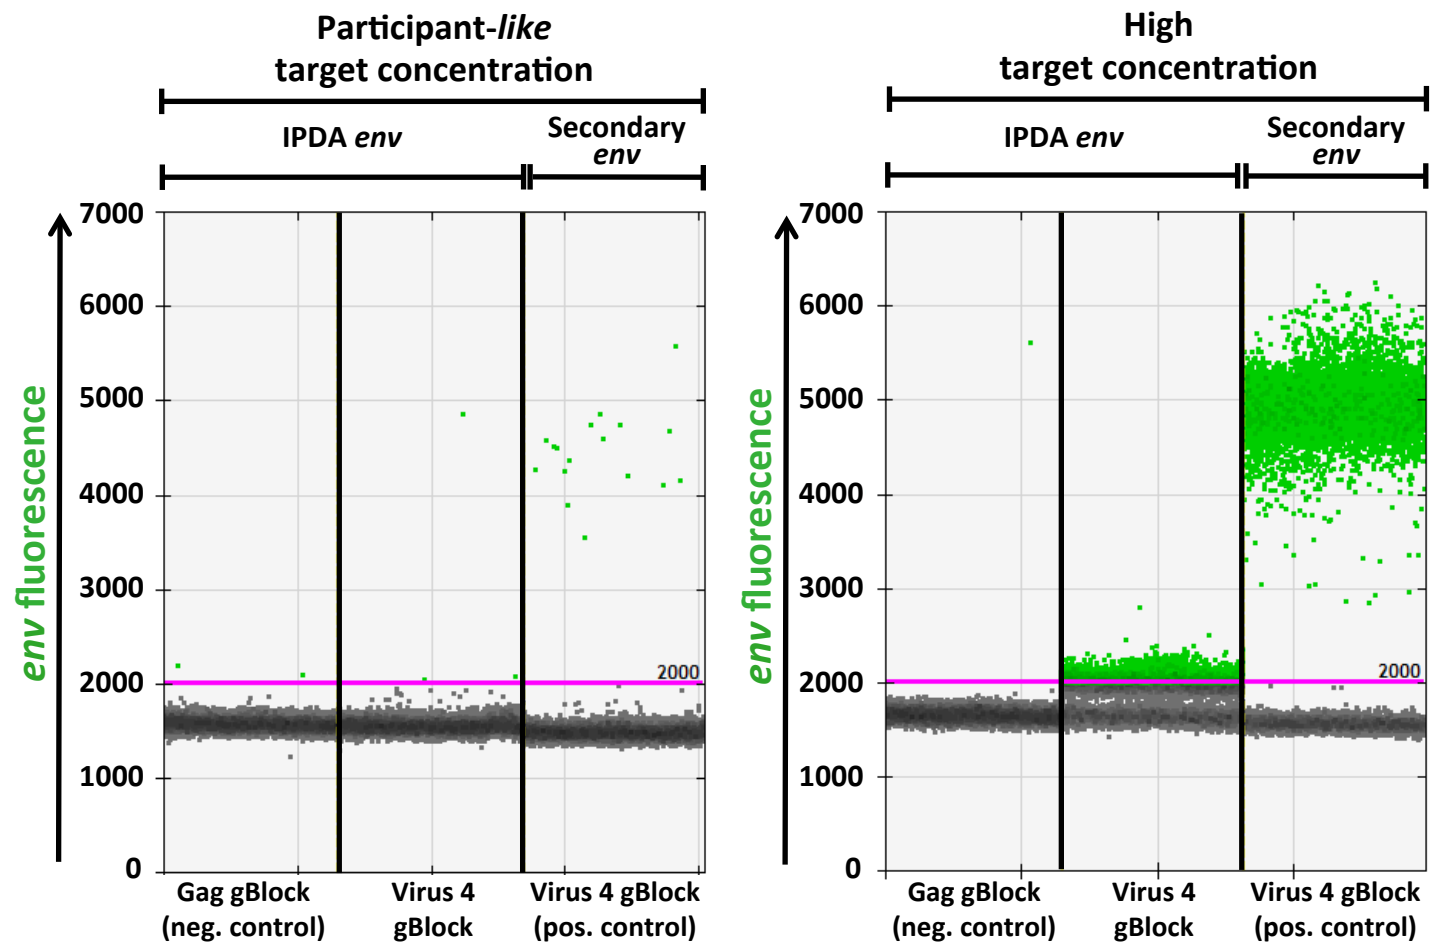

|                                                   | Participant-like target concentration |                    |                               |          | High target concentration |                      |                               |
|---------------------------------------------------|---------------------------------------|--------------------|-------------------------------|----------|---------------------------|----------------------|-------------------------------|
|                                                   | IPDA env                              | Secondary env      |                               | IPDA env | Secondary env             |                      |                               |
|                                                   | Gag gBlock (neg. control)             | Virus 4 gBlock     | Virus 4 gBlock (pos. control) |          | Gag gBlock (neg. control) | Virus 4 gBlock       | Virus 4 gBlock (pos. control) |
| input DNA (nmol)                                  | $1 \times 10^{-6}$                    | $1 \times 10^{-6}$ | $1 \times 10^{-6}$            |          | $6.7 \times 10^{-4}$      | $6.7 \times 10^{-4}$ | $6.7 \times 10^{-4}$          |
| IPDA-measured concentration (copies/ $\mu$ l rxn) | 0.18                                  | 0.25               | 1.5                           |          | 0.09                      | 456                  | 914                           |



**Extended Data Figure 8: OM5346 Virus 4 sequence is undetectable by the IPDA at participant-like concentrations. (A).** Representative 1D *env* plots using IPDA (left) or the secondary *env* reaction (right), from CD4<sup>+</sup> T-cells infected with OM5346 virus 3 (IPDA *env* probe match), virus 4 (IPDA *env* probe G13A mismatch) or uninfected cells (negative control). Positive droplets are green; negative droplets are grey. Copies/ $\mu$ l reaction as calculated from the experimental data are shown below the plots. The left panel is the same as Figure 2B. **(B).** Representative 1D *env* plots of OM5346 virus 4, tested as a synthetic DNA gene fragment ("Virus 4 gBlock"), using IPDA and secondary *env* reactions, at different input concentrations. A Gag synthetic gene fragment ("Gag gBlock") served as the negative control. Input DNA quantity and copies/ $\mu$ l reaction as calculated from the experimental data are shown below the plot. These observations provide a possible explanation to reconcile the original authors' ability to detect this sequence using a pure plasmid template and our inability to detect it at conditions mimicking a participant sample.

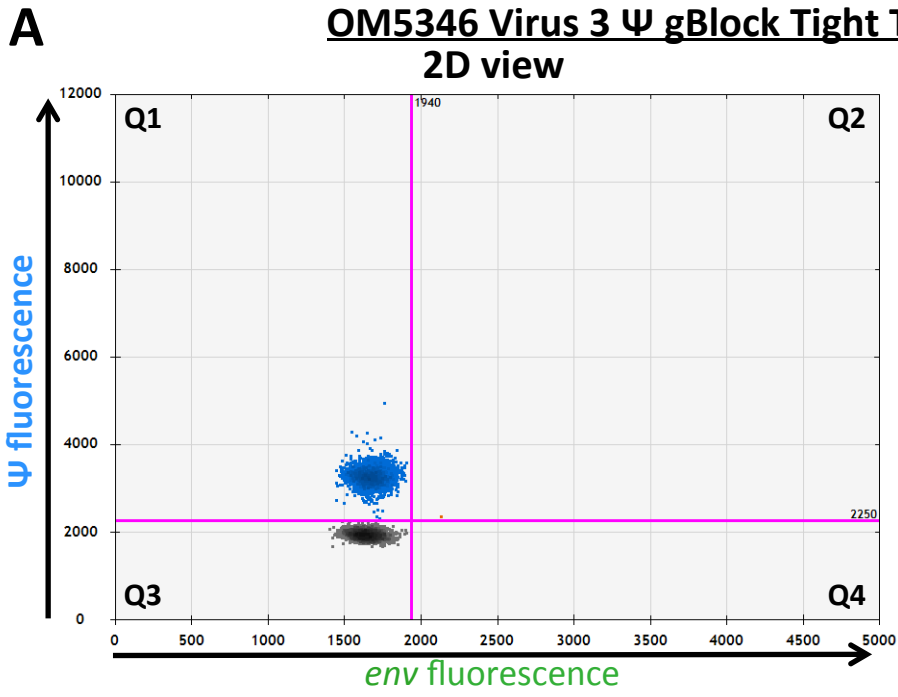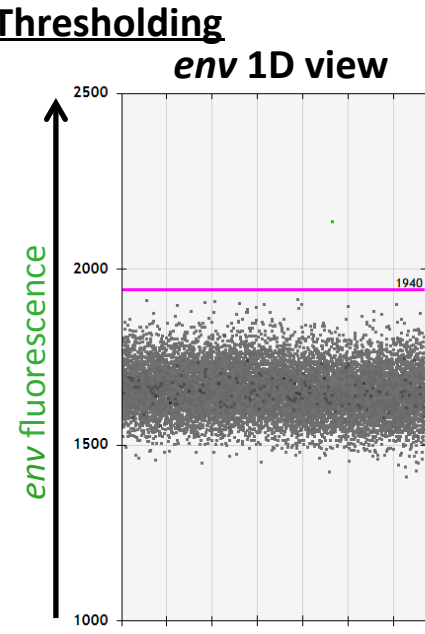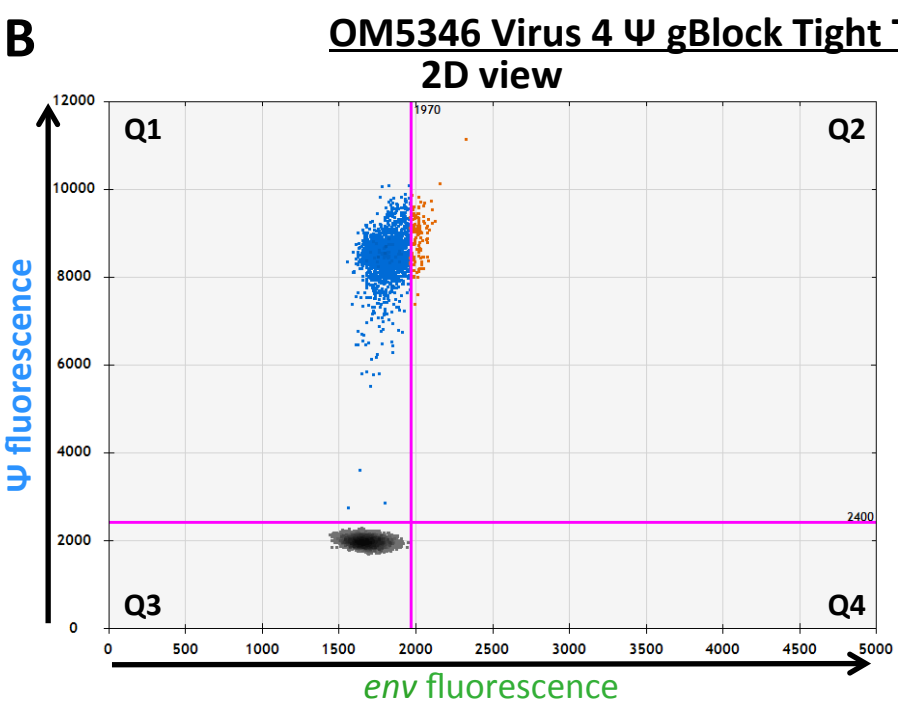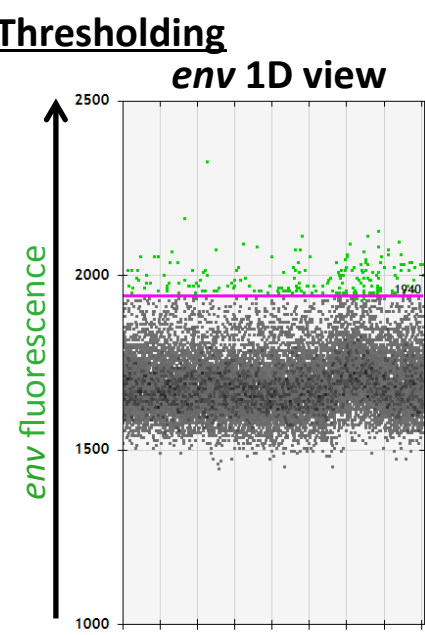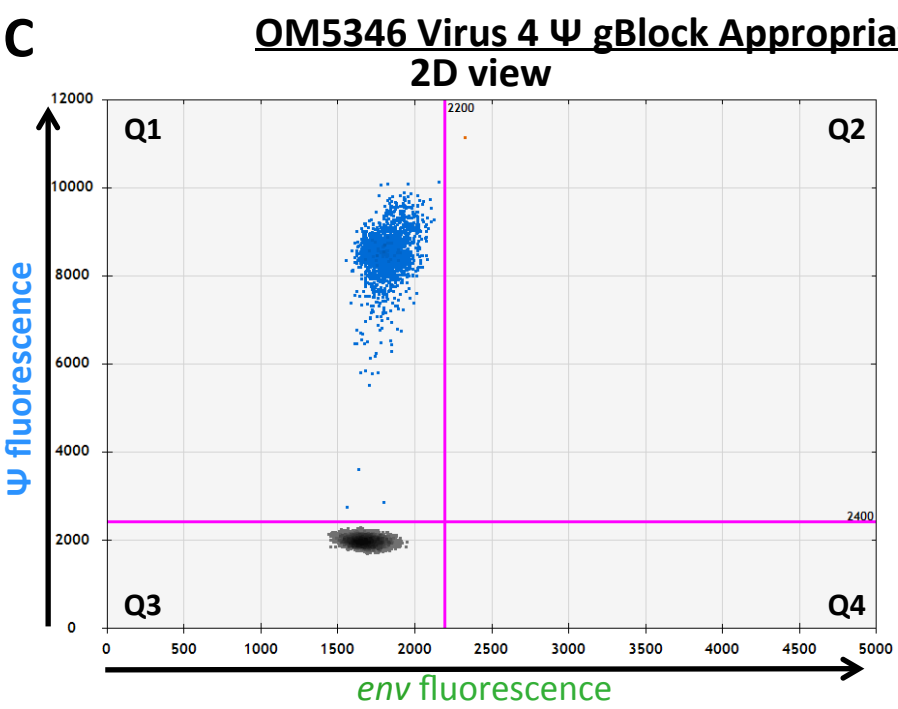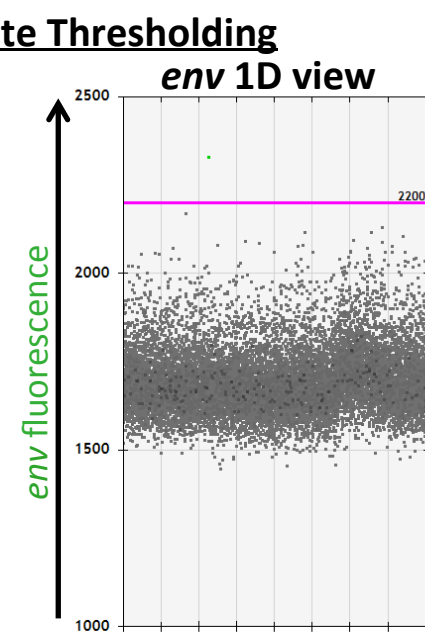

**Extended Data Figure 9: Sequence-specific fluorescence spillover prohibits tight thresholding on negative populations in the IPDA.** (A) 2D (left) and *env* 1D (right) plots of OM5346 virus 3  $\Psi$  region sequence, tested as a synthetic DNA gene fragment (“Virus 3  $\Psi$  gBlock”) without corresponding *env* template. Minimal  $\Psi$ - to *env*- channel spillover occurs when drawing the positive droplet threshold tightly to the double negative population (note the presence of one false-double positive droplet). (B) 2D (left) and *env* 1D (right) plots of OM5346 virus 4  $\Psi$  region sequence, tested as a synthetic DNA gene fragment (“Virus 4  $\Psi$  gBlock”), without corresponding *env* template. With this sequence, drawing of a tight threshold yields marked spillover of  $\Psi$  (FAM) fluorescence into the *env* (VIC) channel, yielding false-positive *env* (and by extension, false-positive intact) signal. (C) 2D (left) and *env* 1D (right) plots of OM5346 Virus 4  $\Psi$  region sequence, tested as a synthetic DNA gene fragment (“Virus 4  $\Psi$  gBlock”) without corresponding *env* template, with a threshold drawn at an appropriate distance from the double negative population. This threshold accommodates the sequence-specific shift in the  $\Psi$ -positive to avoid the creation of false-positive intact or *env*-positive droplet population (note the presence of a single false-double positive droplet).

**A****IPDA *env* False-Negative  
Participants**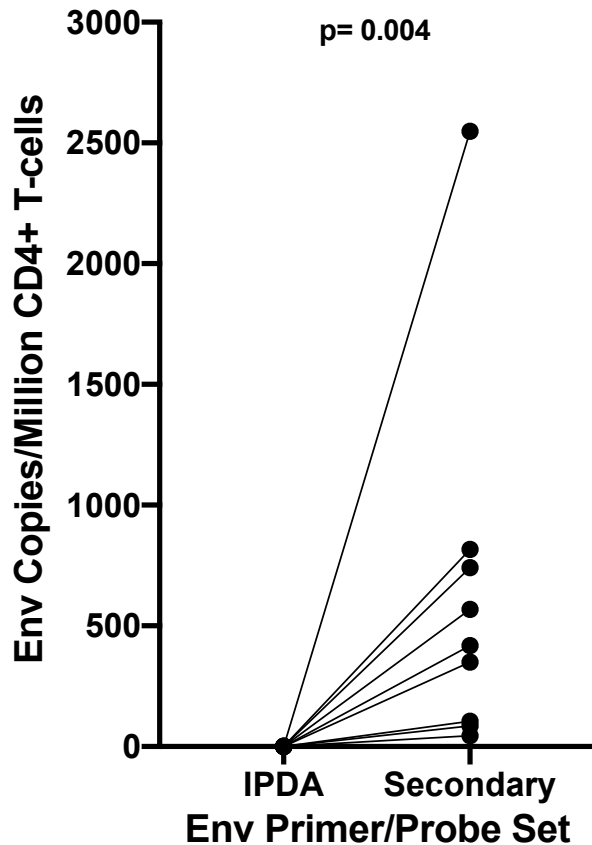**B****Participants Detectable  
by Both Assays**

$p = 0.43$

Env Copies/Million CD4+ T-cells

IPDA Secondary  
Env Primer/Probe Set

| Participant | IPDA (Env Copies/Million CD4+ T-cells) | Secondary (Env Copies/Million CD4+ T-cells) |
|-------------|----------------------------------------|---------------------------------------------|
| 1           | ~10                                    | ~10                                         |
| 2           | ~50                                    | ~50                                         |
| 3           | ~100                                   | ~100                                        |
| 4           | ~150                                   | ~150                                        |
| 5           | ~200                                   | ~200                                        |
| 6           | ~250                                   | ~250                                        |
| 7           | ~300                                   | ~300                                        |
| 8           | ~400                                   | ~400                                        |
| 9           | ~500                                   | ~500                                        |
| 10          | ~600                                   | ~600                                        |
| 11          | ~700                                   | ~700                                        |
| 12          | ~800                                   | ~800                                        |
| 13          | ~850                                   | ~850                                        |
| 14          | ~900                                   | ~900                                        |
| 15          | ~1000                                  | ~1000                                       |
| 16          | ~1400                                  | ~1200                                       |
| 17          | ~2100                                  | ~1950                                       |
| 18          | ~1950                                  | ~1850                                       |
| 19          | ~2150                                  | ~2400                                       |

**Extended Data Figure 10: Performance of the secondary *env* primer/probe set. (A)**

A secondary *env* primer/probe set rescued detection in all 9 cases of IPDA *env* detection

failure **(B)** In 33 participants whose reservoir was detectable by both IPDA and

secondary *env* primer/probe sets, measurements showed no significant differences by

Wilcoxon signed-rank test.

Ext Data Figure 11

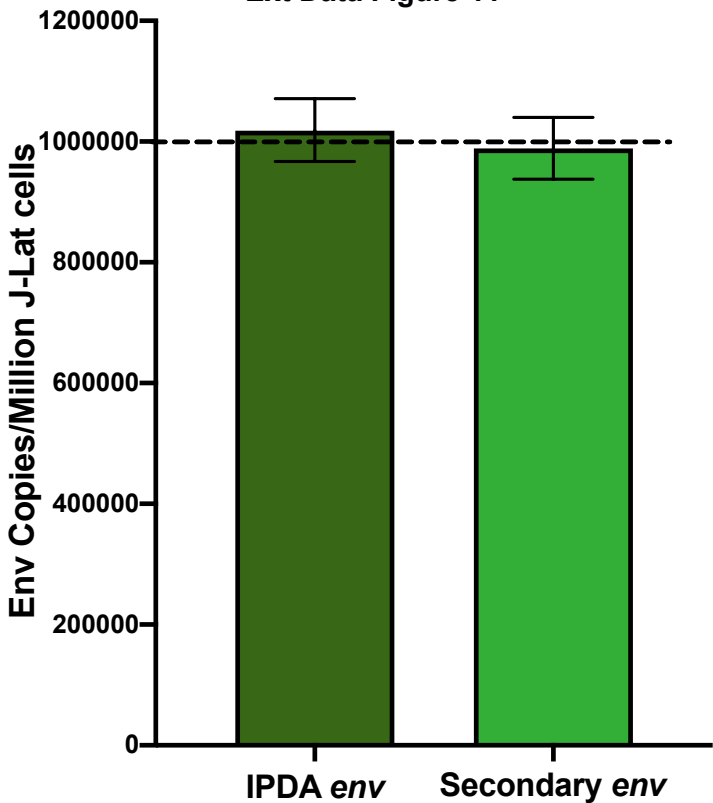

**Extended Data Figure 11: Comparable detection of expected 1:1 HIV-to-Cell ratio in J-Lat cells by IPDA and Secondary *env* reactions.** Error bars indicate 95% total Poisson confidence interval.
